# Supplementary material for: Over-Expression of Porcine Myostatin Missense Mutant Leads to A Gender Difference in Skeletal Muscle Growth between Transgenic Male and Female Mice
Source: MDPI journal article supplement (doi:10.3390/ijms160820020), 2015-08-24
Supplement: s1 [file s1]

## Supplementary Information

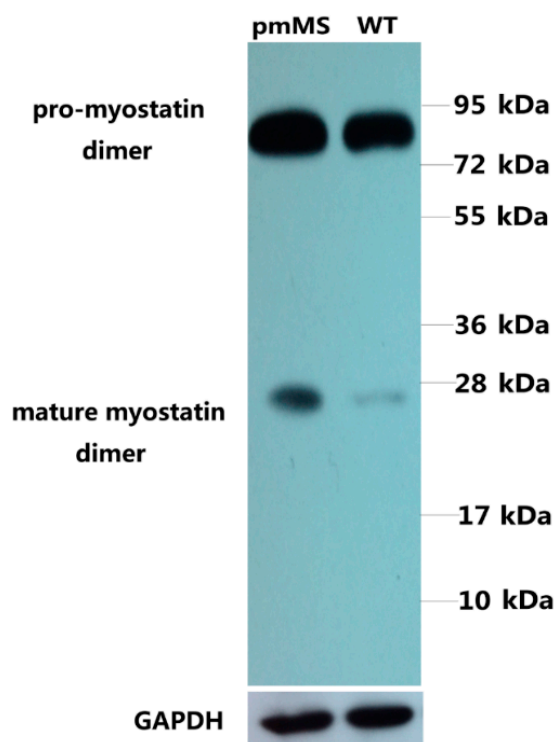

**Figure S1.** Western blot of extracts isolated from gastrocnemius of a representative pmMS (transgenic mice expressing porcine missense mutation myostatin) male mouse and a WT (wild type) male mouse. SDS-PAGE was performed under non-reduced condition as described in Experimental Section. *Pro-myostatin* refers to full-length myostatin containing signal peptide, propeptide and mature myostatin. WT, wild type.
